# Supplementary material for: Identification of Barriers for Active Disease Management and of Medication-Related Problems through Therapeutic Patient Education in Older Home-Care Patients
Source: MDPI journal article supplement (doi:10.3390/healthcare12020231), 2024-01-17
Supplement: s1 [file s1]

Supplementary Materials

Scheda Terapeutica Illustrata

Data di Nascita: \_\_\_\_\_  
INFORMAZIONI PAZIENTE: \_\_\_\_\_  
Nome \_\_\_\_\_  
Cognome \_\_\_\_\_  
Età / Genere \_\_\_\_\_

PERIODO: \_\_\_\_\_  
Consegna \_\_\_\_\_  
Ritiro \_\_\_\_\_  
Codice fiscale \_\_\_\_\_

| ORARI               |              |       |           |                   |              |               |               |               |  | Se si dimentica | Precauzioni |
|---------------------|--------------|-------|-----------|-------------------|--------------|---------------|---------------|---------------|--|-----------------|-------------|
| Terapia Giornaliera | A cosa serve | Forma | Posologia | Lontano dai pasti | 7.00 - 10.00 | 11.00 - 13.00 | 15.00 - 18.00 | 19.00 - 23.00 |  |                 |             |
|                     |              |       |           |                   |              |               |               |               |  |                 |             |
|                     |              |       |           |                   |              |               |               |               |  |                 |             |
|                     |              |       |           |                   |              |               |               |               |  |                 |             |
|                     |              |       |           |                   |              |               |               |               |  |                 |             |
|                     |              |       |           |                   |              |               |               |               |  |                 |             |
|                     |              |       |           |                   |              |               |               |               |  |                 |             |
|                     |              |       |           |                   |              |               |               |               |  |                 |             |

NOTE DEL MEDICO: \_\_\_\_\_  
NOTE DEL FARMACISTA: \_\_\_\_\_  
NOTE DEL PAZIENTE: \_\_\_\_\_  
FIRMA DEL MEDICO: \_\_\_\_\_

Figure S1. Model of STS in Italian language.

Table S1. PIPs detected in the study population.

|                                             | Total | Males | Females |
|---------------------------------------------|-------|-------|---------|
| PIPs according to the Beers criteria, range | 0-11  | 0-3   | 0-11    |
| Confirmed PIPs                              | 0-11  | 0-2   | 0-11    |
| Conditional PIPs                            | 0-3   | 0-2   | 0-3     |
| PIPs according to the STOPP criteria, range | 0-9   | 1-5   | 0-9     |
| Confirmed PIPs                              | 0-7   | 0-3   | 0-7     |
| Conditional PIPs                            | 0-4   | 1-3   | 0-4     |
| DDIs, range                                 | 0-15  | 0-11  | 0-15    |
| Contraindicated                             | 0-0   | 0-0   | 0-0     |
| Major                                       | 0-15  | 0-11  | 0-15    |

Abbreviations: PIPs, potentially inappropriate prescriptions.
